# Supplementary material
Source: PubMed Central journal article supplement (PMC2206575)
Supplement: pnas_0709263105_3.pdf [file pnas_0709263105_3.pdf]

**Table 2.** Diet composition data used for niche width analyses. The study site, ID number, sex and sample size (number of recorded known-outcome feeding dives) for each animal is shown, along with the proportion of total prey captures accounted for by each of 13 prey categories.

| Site | ID | Sex    | sample size | cancer |      | kelp    |        |         | marine |         | cephalopod |        |          | sand |        | small kelp    |
|------|----|--------|-------------|--------|------|---------|--------|---------|--------|---------|------------|--------|----------|------|--------|---------------|
|      |    |        |             | crab   | crab | lobster | urchin | abalone | snail  | mollusk | clam       | mussel | sea star | worm | dollar | invertebrates |
| CC   | 1  | female | 1552        | 0.14   | 0.12 | 0.00    | 0.02   | 0.00    | 0.01   | 0.01    | 0.33       | 0.00   | 0.01     | 0.31 | 0.03   | 0.04          |
| CC   | 2  | female | 300         | 0.40   | 0.26 | 0.00    | 0.05   | 0.23    | 0.00   | 0.00    | 0.03       | 0.00   | 0.00     | 0.00 | 0.00   | 0.03          |
| CC   | 3  | female | 998         | 0.38   | 0.23 | 0.00    | 0.13   | 0.01    | 0.00   | 0.00    | 0.15       | 0.07   | 0.01     | 0.00 | 0.00   | 0.02          |
| CC   | 4  | female | 748         | 0.25   | 0.24 | 0.00    | 0.28   | 0.01    | 0.00   | 0.00    | 0.09       | 0.02   | 0.02     | 0.04 | 0.00   | 0.04          |
| CC   | 5  | female | 1468        | 0.18   | 0.16 | 0.00    | 0.14   | 0.00    | 0.01   | 0.00    | 0.15       | 0.01   | 0.01     | 0.06 | 0.00   | 0.29          |
| CC   | 6  | female | 1560        | 0.17   | 0.25 | 0.00    | 0.19   | 0.00    | 0.00   | 0.00    | 0.27       | 0.03   | 0.02     | 0.05 | 0.00   | 0.02          |
| CC   | 7  | female | 1162        | 0.28   | 0.20 | 0.00    | 0.05   | 0.07    | 0.05   | 0.00    | 0.15       | 0.13   | 0.02     | 0.01 | 0.00   | 0.04          |
| CC   | 8  | female | 1500        | 0.06   | 0.27 | 0.00    | 0.05   | 0.00    | 0.00   | 0.01    | 0.19       | 0.12   | 0.00     | 0.08 | 0.01   | 0.20          |
| CC   | 9  | male   | 1740        | 0.23   | 0.41 | 0.00    | 0.14   | 0.00    | 0.00   | 0.00    | 0.13       | 0.06   | 0.00     | 0.00 | 0.00   | 0.02          |
| CC   | 10 | female | 950         | 0.24   | 0.37 | 0.00    | 0.03   | 0.00    | 0.01   | 0.00    | 0.15       | 0.07   | 0.01     | 0.11 | 0.00   | 0.01          |
| CC   | 11 | male   | 736         | 0.06   | 0.79 | 0.00    | 0.03   | 0.00    | 0.00   | 0.02    | 0.04       | 0.00   | 0.01     | 0.01 | 0.00   | 0.02          |
| CC   | 12 | female | 1478        | 0.10   | 0.27 | 0.00    | 0.01   | 0.00    | 0.00   | 0.04    | 0.39       | 0.01   | 0.02     | 0.13 | 0.00   | 0.02          |
| CC   | 13 | female | 1798        | 0.07   | 0.11 | 0.00    | 0.00   | 0.00    | 0.00   | 0.00    | 0.31       | 0.00   | 0.02     | 0.02 | 0.00   | 0.47          |
| CC   | 14 | female | 578         | 0.19   | 0.43 | 0.00    | 0.04   | 0.00    | 0.00   | 0.00    | 0.01       | 0.00   | 0.14     | 0.00 | 0.00   | 0.18          |
| CC   | 15 | female | 833         | 0.03   | 0.04 | 0.00    | 0.01   | 0.00    | 0.00   | 0.01    | 0.27       | 0.44   | 0.00     | 0.04 | 0.00   | 0.16          |
| CC   | 16 | male   | 459         | 0.05   | 0.84 | 0.00    | 0.05   | 0.00    | 0.00   | 0.01    | 0.02       | 0.01   | 0.00     | 0.00 | 0.00   | 0.02          |
| CC   | 17 | male   | 328         | 0.22   | 0.56 | 0.00    | 0.00   | 0.00    | 0.00   | 0.00    | 0.15       | 0.00   | 0.05     | 0.01 | 0.00   | 0.01          |
| CC   | 18 | female | 621         | 0.37   | 0.41 | 0.00    | 0.03   | 0.09    | 0.03   | 0.00    | 0.00       | 0.01   | 0.02     | 0.02 | 0.00   | 0.03          |
| CC   | 19 | female | 764         | 0.10   | 0.31 | 0.00    | 0.01   | 0.00    | 0.00   | 0.00    | 0.07       | 0.00   | 0.11     | 0.02 | 0.00   | 0.39          |
| CC   | 20 | female | 854         | 0.06   | 0.15 | 0.00    | 0.12   | 0.01    | 0.00   | 0.00    | 0.18       | 0.24   | 0.02     | 0.11 | 0.00   | 0.11          |
| CC   | 21 | female | 836         | 0.28   | 0.21 | 0.00    | 0.00   | 0.00    | 0.00   | 0.00    | 0.18       | 0.00   | 0.25     | 0.01 | 0.00   | 0.07          |
| CC   | 22 | female | 533         | 0.02   | 0.17 | 0.00    | 0.01   | 0.00    | 0.76   | 0.00    | 0.02       | 0.00   | 0.00     | 0.00 | 0.00   | 0.01          |
| CC   | 23 | female | 856         | 0.21   | 0.58 | 0.00    | 0.02   | 0.00    | 0.01   | 0.00    | 0.09       | 0.00   | 0.04     | 0.00 | 0.01   | 0.03          |
| CC   | 24 | female | 827         | 0.03   | 0.28 | 0.00    | 0.07   | 0.00    | 0.00   | 0.00    | 0.03       | 0.28   | 0.01     | 0.07 | 0.00   | 0.23          |
| CC   | 25 | female | 497         | 0.01   | 0.08 | 0.00    | 0.00   | 0.01    | 0.77   | 0.00    | 0.04       | 0.00   | 0.06     | 0.01 | 0.00   | 0.00          |
| CC   | 26 | female | 643         | 0.01   | 0.11 | 0.00    | 0.00   | 0.00    | 0.84   | 0.00    | 0.01       | 0.00   | 0.03     | 0.00 | 0.00   | 0.00          |
| CC   | 27 | female | 662         | 0.36   | 0.59 | 0.00    | 0.01   | 0.00    | 0.00   | 0.01    | 0.03       | 0.00   | 0.00     | 0.00 | 0.00   | 0.00          |
| CC   | 28 | female | 937         | 0.08   | 0.24 | 0.00    | 0.05   | 0.00    | 0.58   | 0.00    | 0.00       | 0.00   | 0.04     | 0.00 | 0.00   | 0.00          |
