# Supplementary material
Source: PubMed Central journal article supplement (PMC2206575)
Supplement: pnas_0709263105_4.pdf [file pnas_0709263105_4.pdf]

**Table 3.** Observational data used for analyses of feeding behaviour. As well as study site, ID number and sex, the following behavioural variables are summarized for each animal: A) proportion of dives resulting in prey, B) duration of successful dives (s), C) surface interval, successful dives (s), D) duration of unsuccessful dives (s), E) surface interval, unsuccessful dives (s), F) variance in dive duration, G) variance in surface interval duration, H) number of prey items per dive, I) variance in number of prey items, J) mean per-item handling time (s), K) variance in per-item handling time (s), L) frequency of tool use (items per dive), M) mean prey size (cm), and N) variance in prey size. The final column indicates the behavioural cluster (arbitrarily numbered 1-4) to which each study animal was assigned using hierarchical cluster analysis.

| Site | ID | Sex    | A     | B     | C     | D     | E    | F    | G     | H     | I     | J     | K     | L     | M     | N     | Cluster |
|------|----|--------|-------|-------|-------|-------|------|------|-------|-------|-------|-------|-------|-------|-------|-------|---------|
| CC   | 1  | female | 0.760 | 60.1  | 38.7  | 55.4  | 23.1 | 21.7 | 34.0  | 1.730 | 1.340 | 25.6  | 34.2  | 0.751 | 2.977 | 2.139 | 3       |
| CC   | 2  | female | 0.429 | 71.4  | 104.2 | 80.1  | 33.6 | 29.6 | 94.5  | 1.049 | 0.210 | 115.1 | 141.0 | 1.000 | 7.237 | 4.432 | 2       |
| CC   | 3  | female | 0.723 | 71.6  | 81.5  | 78.2  | 34.7 | 32.3 | 58.9  | 1.674 | 1.820 | 67.6  | 61.9  | 0.030 | 5.155 | 3.330 | 2       |
| CC   | 4  | female | 0.646 | 43.8  | 51.1  | 51.7  | 22.4 | 24.8 | 56.8  | 1.309 | 0.900 | 50.2  | 82.5  | 2.500 | 4.171 | 3.233 | 1       |
| CC   | 5  | female | 0.767 | 52.6  | 36.1  | 58.2  | 24.3 | 23.8 | 26.4  | 1.550 | 1.180 | 34.0  | 31.3  | 0.385 | 3.464 | 2.119 | 3       |
| CC   | 6  | female | 0.735 | 54.9  | 49.3  | 54.3  | 26.6 | 27.3 | 41.9  | 1.611 | 1.290 | 40.8  | 55.2  | 0.022 | 3.548 | 2.493 | 3       |
| CC   | 7  | female | 0.605 | 52.4  | 86.9  | 59.1  | 34.7 | 25.2 | 75.3  | 2.850 | 4.170 | 50.7  | 67.9  | 4.511 | 4.717 | 3.901 | 2       |
| CC   | 8  | female | 0.779 | 45.2  | 65.9  | 46.4  | 31.2 | 28.3 | 50.1  | 1.699 | 1.460 | 50.7  | 52.6  | 0.280 | 3.330 | 1.845 | 1       |
| CC   | 9  | male   | 0.585 | 48.4  | 63.2  | 43.6  | 27.4 | 24.2 | 49.8  | 1.671 | 1.610 | 45.2  | 38.2  | 0.161 | 4.064 | 2.591 | 1       |
| CC   | 10 | female | 0.661 | 58.4  | 44.9  | 57.6  | 23.3 | 27.6 | 27.9  | 1.926 | 2.650 | 32.7  | 34.3  | 0.085 | 3.752 | 2.218 | 3       |
| CC   | 11 | male   | 0.486 | 50.0  | 61.2  | 48.6  | 29.0 | 30.5 | 37.7  | 1.409 | 1.270 | 46.5  | 25.7  | 0.250 | 3.936 | 2.046 | 1       |
| CC   | 12 | female | 0.695 | 55.7  | 41.9  | 60.2  | 22.4 | 22.6 | 38.7  | 1.140 | 0.490 | 34.9  | 44.7  | 0.219 | 3.535 | 2.326 | 3       |
| CC   | 13 | female | 0.711 | 58.1  | 42.9  | 59.4  | 24.7 | 19.5 | 35.1  | 1.127 | 0.450 | 43.9  | 42.9  | 0.034 | 4.317 | 2.769 | 3       |
| CC   | 14 | female | 0.856 | 100.1 | 79.0  | 117.6 | 62.5 | 37.2 | 63.7  | 1.083 | 0.350 | 68.9  | 47.9  | 0.041 | 5.129 | 2.961 | 2       |
| CC   | 15 | female | 0.671 | 44.9  | 56.8  | 36.3  | 26.7 | 21.0 | 59.6  | 2.731 | 2.810 | 18.6  | 26.6  | 0.400 | 2.399 | 1.841 | 4       |
| CC   | 16 | male   | 0.549 | 56.4  | 50.4  | 54.4  | 27.8 | 28.9 | 30.1  | 1.080 | 0.380 | 39.0  | 29.5  | 0.000 | 3.051 | 1.990 | 3       |
| CC   | 17 | male   | 0.685 | 71.3  | 41.3  | 56.2  | 43.4 | 33.6 | 42.5  | 1.165 | 0.750 | 33.1  | 40.4  | 0.018 | 3.031 | 1.965 | 3       |
| CC   | 18 | female | 0.275 | 42.2  | 89.8  | 50.8  | 25.1 | 21.7 | 63.0  | 1.043 | 0.260 | 89.4  | 105.0 | 0.011 | 5.699 | 4.425 | 2       |
| CC   | 19 | female | 0.773 | 58.1  | 62.9  | 74.8  | 34.6 | 23.5 | 130.3 | 1.112 | 0.420 | 62.5  | 67.2  | 0.100 | 4.454 | 3.124 | 2       |
| CC   | 20 | female | 0.796 | 48.8  | 39.8  | 42.0  | 23.0 | 25.4 | 36.7  | 2.258 | 2.450 | 23.8  | 23.3  | 0.000 | 2.659 | 1.872 | 3       |

| Site | ID | Sex    | A     | B    | C    | D    | E    | F    | G     | H     | I     | J    | K     | L     | M     | N     | Cluster |
|------|----|--------|-------|------|------|------|------|------|-------|-------|-------|------|-------|-------|-------|-------|---------|
| CC   | 21 | female | 0.651 | 82.7 | 79.1 | 87.6 | 38.0 | 32.4 | 62.8  | 1.239 | 0.740 | 64.9 | 64.8  | 0.471 | 5.296 | 3.608 | 2       |
| CC   | 22 | female | 0.864 | 53.2 | 67.3 | 37.7 | 49.8 | 21.8 | 65.1  | 4.668 | 4.130 | 20.1 | 31.0  | 1.847 | 1.812 | 1.666 | 4       |
| CC   | 23 | female | 0.700 | 65.8 | 55.9 | 72.2 | 31.0 | 27.7 | 59.4  | 1.077 | 0.370 | 51.3 | 52.5  | 0.165 | 3.876 | 2.874 | 1       |
| CC   | 24 | female | 0.776 | 46.9 | 37.2 | 46.7 | 22.5 | 20.4 | 30.6  | 1.480 | 1.120 | 28.6 | 27.5  | 0.000 | 2.925 | 1.762 | 3       |
| CC   | 25 | female | 0.888 | 91.9 | 83.7 | 89.9 | 54.5 | 37.2 | 64.7  | 4.028 | 3.680 | 33.3 | 54.3  | 1.488 | 2.520 | 2.039 | 4       |
| CC   | 26 | female | 0.879 | 69.4 | 77.4 | 71.8 | 46.4 | 26.5 | 56.1  | 5.660 | 5.870 | 23.0 | 45.5  | 2.570 | 1.908 | 1.715 | 4       |
| CC   | 27 | female | 0.575 | 68.4 | 95.4 | 64.1 | 33.5 | 32.9 | 100.8 | 1.033 | 0.210 | 88.1 | 120.7 | 0.000 | 4.587 | 3.184 | 2       |
| CC   | 28 | female | 0.805 | 48.9 | 47.0 | 48.5 | 27.1 | 28.7 | 43.8  | 3.234 | 3.080 | 27.1 | 42.6  | 0.730 | 2.300 | 2.219 | 3       |
| CC   | 29 | male   | 0.719 | 40.8 | 69.4 | 52.5 | 38.4 | 30.6 | 52.7  | 1.881 | 1.440 | 42.3 | 38.1  | 0.137 | 3.923 | 2.524 | 1       |
| CC   | 30 | male   | 0.881 | 82.5 | 71.1 | 56.0 | 44.3 | 33.4 | 49.0  | 3.729 | 3.310 | 14.8 | 11.2  | 0.487 | 2.293 | 1.638 | 4       |
| CC   | 31 | female | 0.394 | 42.1 | 67.5 | 56.9 | 19.9 | 28.0 | 67.9  | 1.306 | 0.920 | 81.8 | 112.7 | 0.019 | 4.513 | 3.544 | 2       |
| CC   | 32 | female | 0.736 | 71.9 | 43.8 | 80.7 | 27.5 | 22.3 | 38.1  | 1.123 | 0.410 | 35.0 | 34.8  | 0.023 | 3.093 | 1.803 | 3       |
| CC   | 33 | female | 0.610 | 60.2 | 57.8 | 68.7 | 28.4 | 27.8 | 55.6  | 1.260 | 0.830 | 51.5 | 57.2  | 0.039 | 4.525 | 3.545 | 1       |
| CC   | 34 | male   | 0.452 | 40.8 | 49.7 | 33.5 | 24.4 | 25.4 | 44.1  | 1.166 | 0.560 | 32.0 | 30.5  | 0.000 | 2.922 | 2.413 | 1       |
| SN   | 1  | male   | 0.453 | 33.8 | 44.2 | 22.5 | 12.9 | 19.8 | 30.8  | 1.021 | 0.140 | 44.3 | 42.5  | 0.055 | 6.280 | 2.729 | 1       |
| SN   | 2  | female | 0.433 | 53.4 | 66.5 | 54.9 | 27.7 | 30.3 | 64.7  | 1.090 | 0.450 | 63.8 | 70.6  | 0.264 | 6.916 | 3.679 | 2       |
| SN   | 3  | male   | 0.631 | 39.5 | 52.8 | 28.5 | 18.0 | 24.1 | 36.6  | 1.070 | 0.260 | 46.7 | 43.6  | 0.071 | 6.494 | 2.209 | 1       |
| SN   | 4  | male   | 0.538 | 34.5 | 57.1 | 24.5 | 16.3 | 19.2 | 40.2  | 1.054 | 0.230 | 48.6 | 32.7  | 0.126 | 5.285 | 2.343 | 1       |
| SN   | 5  | female | 0.629 | 45.6 | 56.5 | 35.2 | 22.3 | 30.2 | 73.9  | 1.032 | 0.220 | 48.7 | 31.5  | 0.141 | 5.711 | 2.435 | 1       |
| SN   | 6  | female | 0.424 | 69.3 | 54.4 | 54.9 | 18.4 | 40.7 | 32.0  | 1.000 | 0.000 | 54.6 | 38.4  | 0.080 | 5.337 | 2.424 | 1       |
| SN   | 7  | male   | 0.697 | 51.8 | 43.9 | 39.6 | 23.6 | 33.8 | 46.6  | 1.012 | 0.110 | 41.9 | 55.9  | 0.164 | 5.751 | 2.490 | 1       |
| SN   | 8  | female | 0.580 | 44.3 | 41.9 | 33.9 | 17.3 | 26.2 | 38.5  | 1.077 | 0.430 | 39.3 | 40.0  | 0.432 | 4.794 | 3.084 | 1       |
| SN   | 9  | female | 0.489 | 38.5 | 45.2 | 31.4 | 20.4 | 19.9 | 37.8  | 1.018 | 0.130 | 41.1 | 48.7  | 0.101 | 5.723 | 2.946 | 1       |
| SN   | 10 | female | 0.710 | 28.8 | 36.2 | 23.8 | 21.8 | 19.8 | 69.0  | 1.034 | 0.220 | 34.4 | 38.1  | 0.174 | 5.800 | 2.197 | 1       |
| SN   | 11 | female | 0.601 | 49.7 | 74.5 | 31.2 | 30.2 | 34.7 | 58.1  | 1.047 | 0.210 | 71.9 | 53.1  | 0.321 | 5.270 | 2.539 | 1       |
