# Supplementary material
Source: PubMed Central journal article supplement (PMC2206575)
Supplement: pnas_0709263105_5.pdf [file pnas_0709263105_5.pdf]

**Table 4.** Summary statistics from a linear discriminant analysis conducted to determine the efficacy with which 45 individual sea otters could be reliably classified into one of four foraging modes on the basis of a suite of observational behavioural variables. Two sets of statistics are shown: the discriminant function parameters are shown for the first three canonical functions, standardized such that the overall mean score and the pooled within-group variances are both equal to one; and for each variable, the mean value is shown for animals assigned to each of the four clusters. The final column shows the “F-to-remove” value, representing a measure of the relative impact that removing each variable would have on the analysis results. Note that the letter codes listed with each variable are provided to facilitate cross-referencing with Table S3, where the raw data for this analysis are presented. Two of the parameters listed in Table S3 (E: surface interval for unsuccessful dives; and K: variance in per-item handling time) were dropped from this analysis because they failed to contribute significantly to classification (F-to-remove value < 0.5).

| Behavioral variable                      | <u>Standardized Canonical Functions</u> |            |            | <u>Within-Cluster Mean Values</u> |           |           |           | F-to-remove |
|------------------------------------------|-----------------------------------------|------------|------------|-----------------------------------|-----------|-----------|-----------|-------------|
|                                          | Function 1                              | Function 2 | Function 3 | Cluster 1                         | Cluster 2 | Cluster 3 | Cluster 4 |             |
| A proportion of dives resulting in prey  | -0.222                                  | 0.643      | 0.024      | 0.596                             | 0.571     | 0.723     | 0.837     | 1.56        |
| B duration of successful dives (s)       | -1.359                                  | -0.502     | 1.362      | 46.15                             | 64.23     | 57.00     | 68.38     | 4.21        |
| C surface interval, successful dives (s) | 0.265                                   | -0.843     | -0.934     | 54.50                             | 81.28     | 42.79     | 71.25     | 4.57        |
| D duration of unsuccessful dives (s)     | 0.827                                   | -0.121     | -0.209     | 41.26                             | 72.42     | 56.14     | 58.34     | 1.08        |
| F variance in dive duration              | 0.621                                   | 0.315      | -0.840     | 27.10                             | 29.33     | 25.14     | 27.95     | 3.95        |
| G variance in surface interval duration  | 0.168                                   | -0.782     | 0.032      | 48.31                             | 78.18     | 35.50     | 58.90     | 4.95        |
| H number of prey items per dive          | -1.538                                  | -0.957     | -0.829     | 1.213                             | 1.348     | 1.619     | 4.163     | 6.92        |
| I variance in number of prey items       | 0.958                                   | 0.318      | 1.802      | 0.577                             | 0.955     | 1.299     | 3.960     | 3.51        |
| J mean per-item handling time (s)        | 0.089                                   | 0.769      | 1.184      | 46.72                             | 75.28     | 33.20     | 21.98     | 3.83        |
| L frequency of tool use (items per dive) | 0.086                                   | -0.409     | -0.379     | 0.289                             | 0.645     | 0.189     | 1.358     | 1.17        |
| M mean prey size (cm)                    | 0.408                                   | -0.470     | -0.442     | 4.844                             | 5.370     | 3.221     | 2.186     | 3.1         |
| N variance in prey size                  | 0.351                                   | -0.150     | 0.117      | 2.582                             | 3.619     | 2.140     | 1.780     | 0.77        |
