# Supplementary material
Source: PubMed Central journal article supplement (PMC2206575)

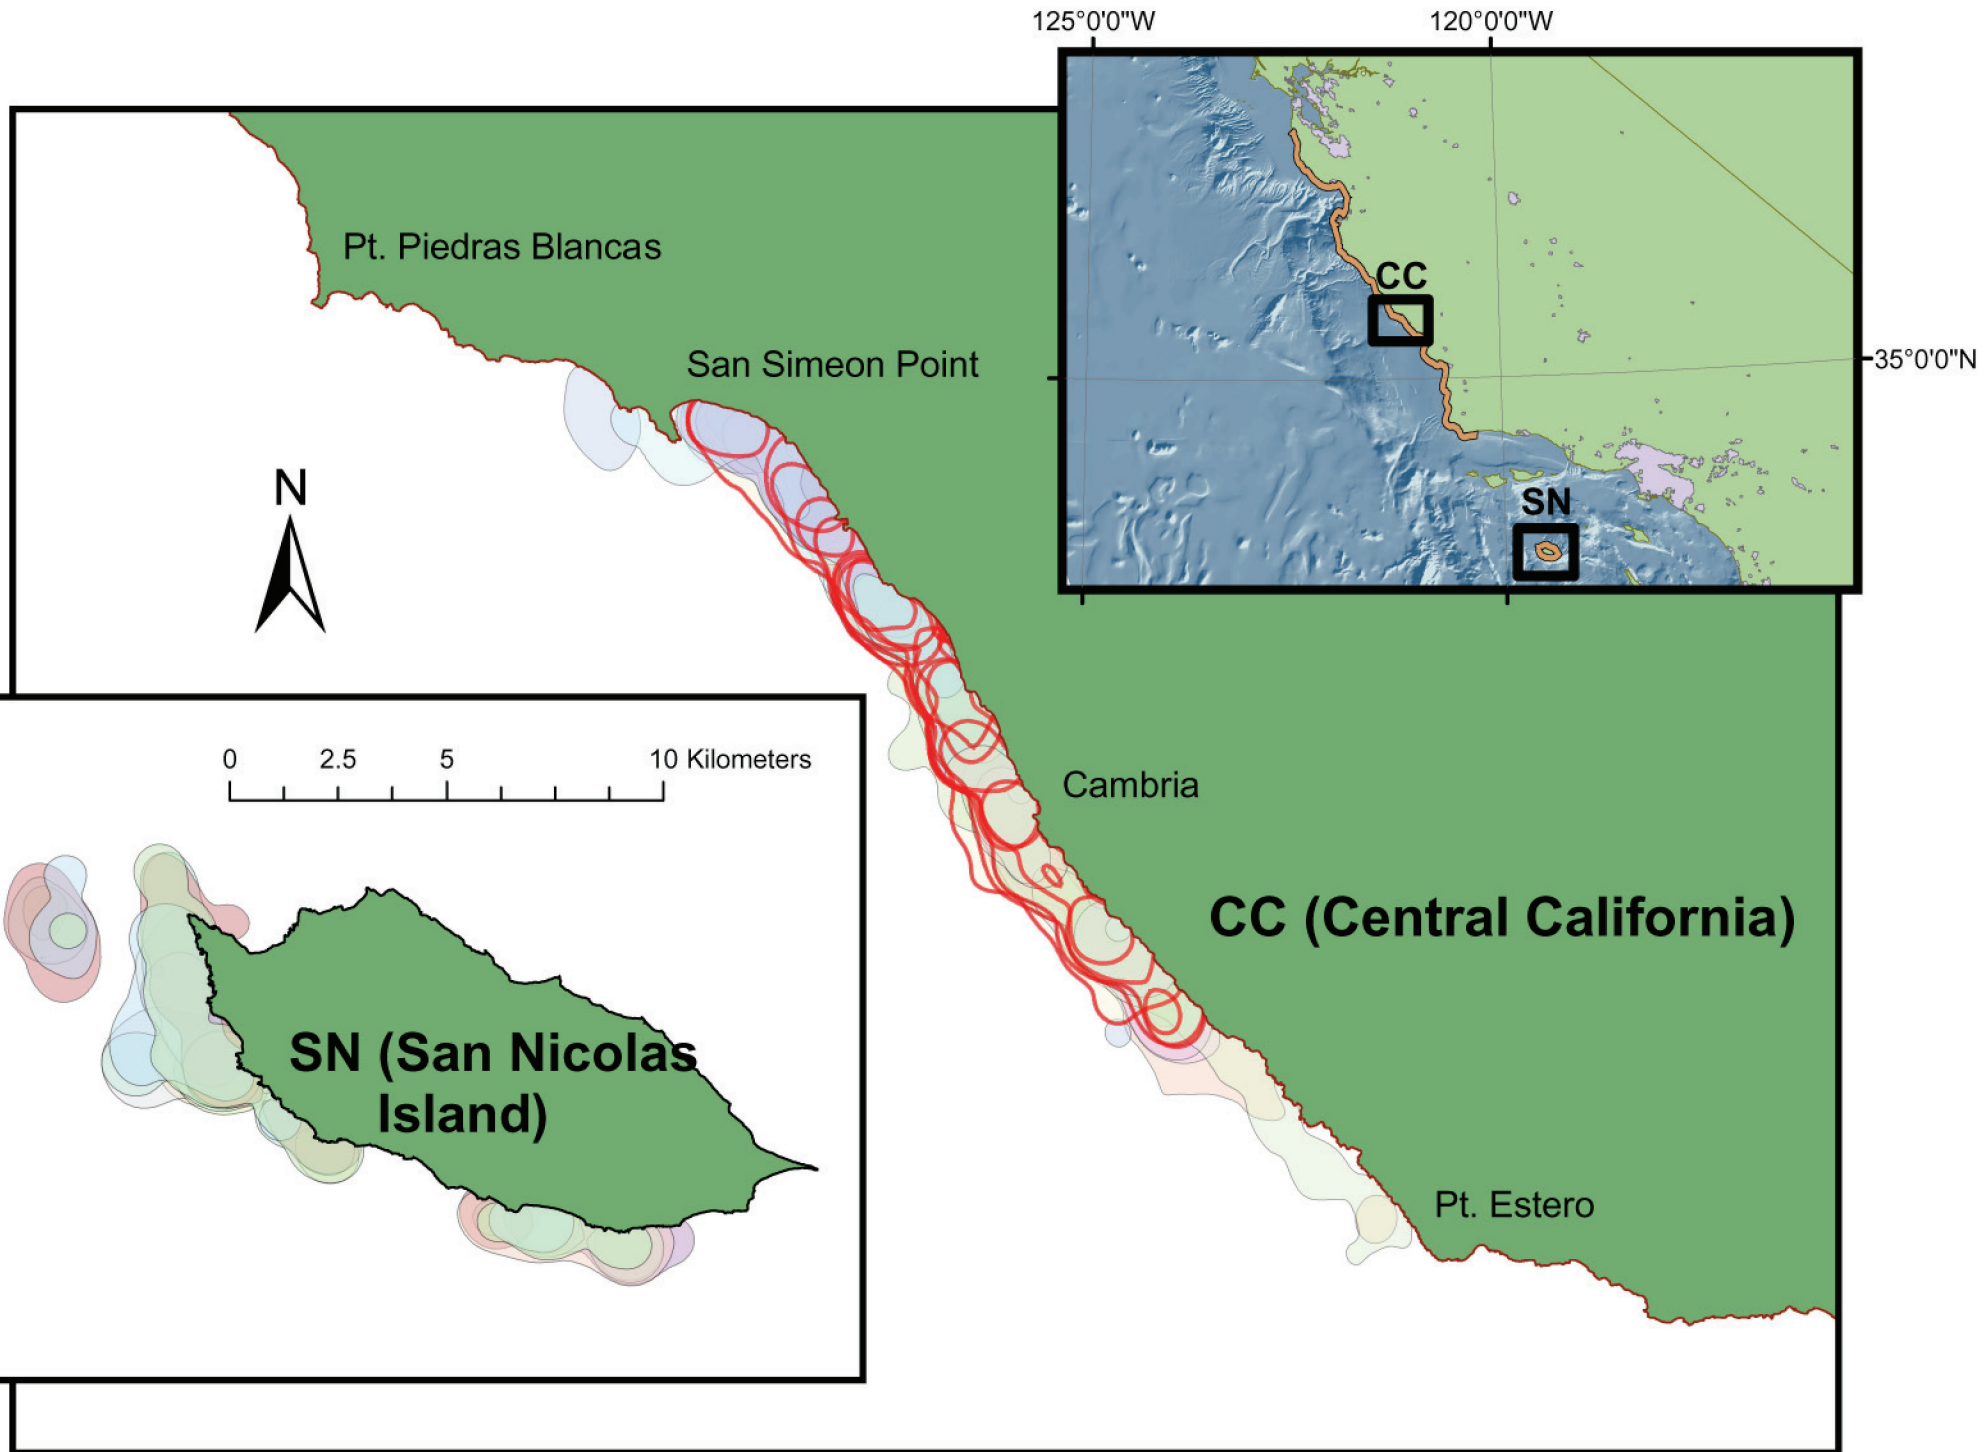

Supplement: pnas_0709263105_1.pdf [file pnas_0709263105_1.pdf]

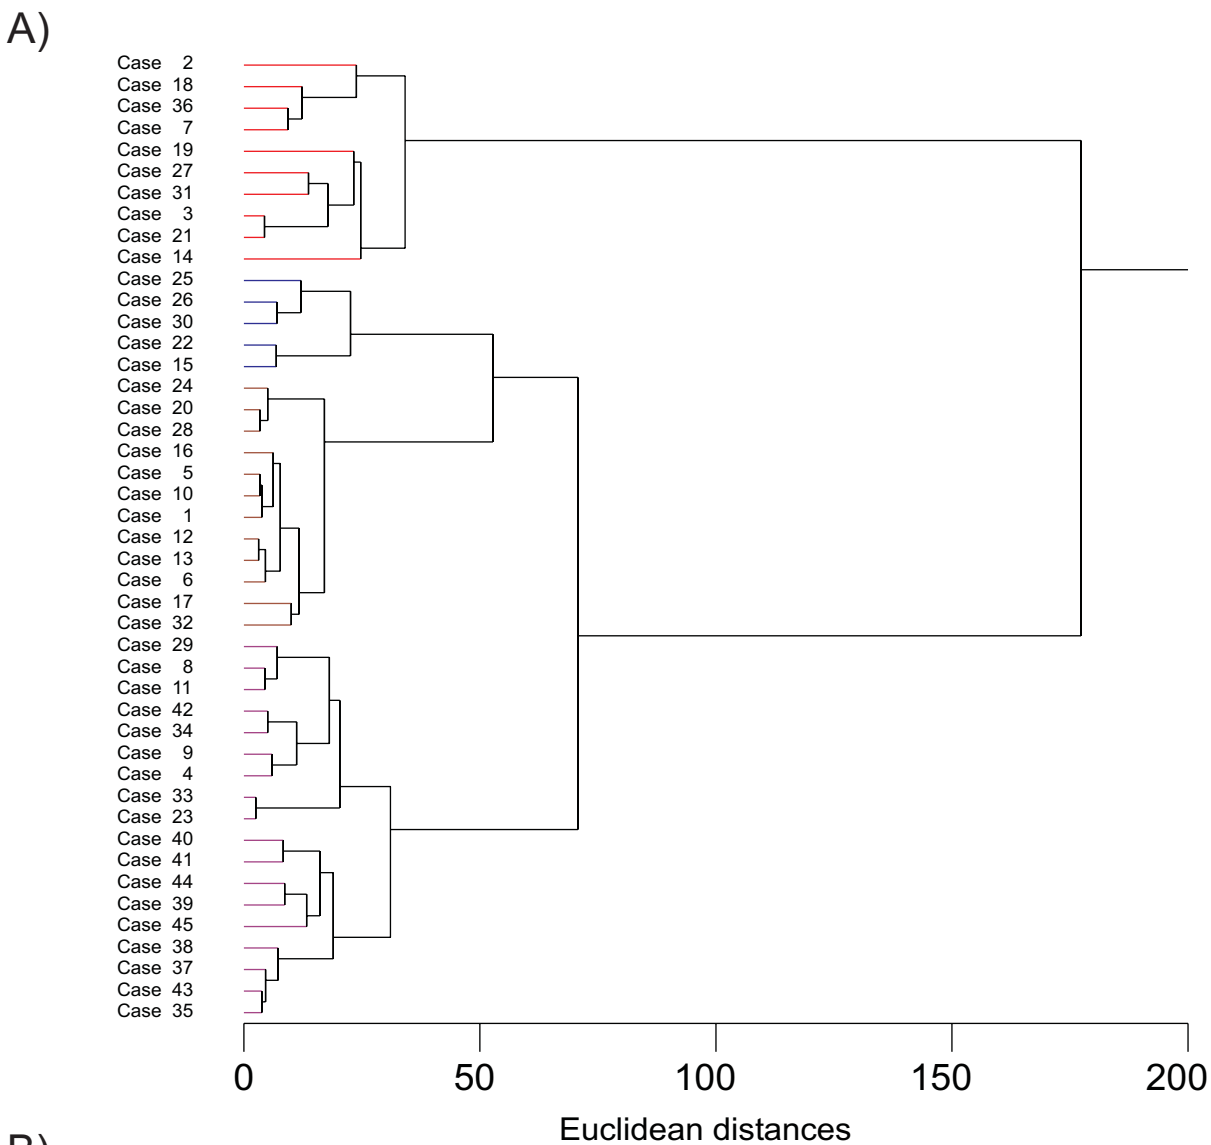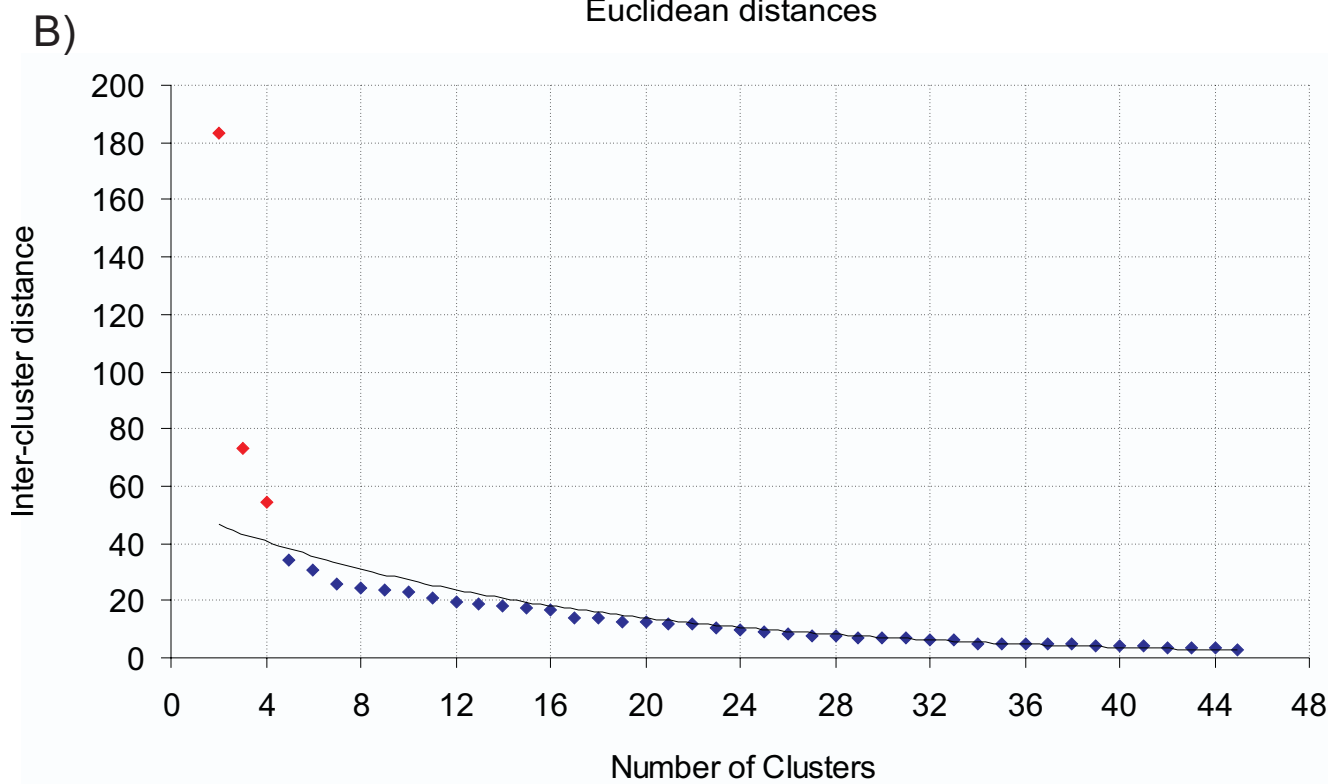

Supplement: pnas_0709263105_2.pdf [file pnas_0709263105_2.pdf]
